# Supplementary material
Source: publisher figshare collection journal article supplement (https://acs.figshare.com/ndownloader/files/4420426)

*Iron-Mediated Photochemical Decomposition of Methylmercury in an Arctic  
Alaskan Lake*

(es-2010-006934R1)

By Chad R. Hammerschmidt and William F. Fitzgerald

**Three pages, including one table and one figure**

.

**Table S1.** Physicochemical characteristics and rate constants of monomethylmercury ( $\text{CH}_3\text{Hg}^+$ ) photodecomposition ( $\pm 1$  standard deviation) in four arctic Alaskan surface waters.<sup>a</sup>

| Water source      | pH  | DOC ( $\mu\text{M}$ ) | $\text{CH}_3\text{Hg}^+$<br>photodecomposition ( $\text{d}^{-1}$ ) |
|-------------------|-----|-----------------------|--------------------------------------------------------------------|
| Toolik Lake       | 7.6 | 380                   | $0.158 \pm 0.037$                                                  |
| Green Cabin Lake  | 7.6 | 340                   | $0.167 \pm 0.012$                                                  |
| Island Lake       | 7.5 | 340                   | $0.170 \pm 0.026$                                                  |
| Tundra pore water | 5.3 | 830                   | $0.135 \pm 0.031$                                                  |

<sup>a</sup>Rate constants determined from a 2-d incubation (initial  $\text{CH}_3\text{Hg}^+ = 11 \text{ pM}$ ) at the surface of Toolik Lake (photosynthetically active radiation =  $57 \text{ E m}^{-2} \text{ d}^{-1}$ ; temperature =  $13.2 \pm 0.4 \text{ }^\circ\text{C}$ ). DOC = dissolved organic carbon.

**Figure S1.** Photochemical decomposition of  $\text{CH}_3\text{Hg}^+$  (initial, 11 pM or  $1.1 \times 10^{-11}$  M) in 0.2- $\mu\text{m}$  filtered surface water of Toolik Lake incubated for 2 d at the surface (PAR =  $43 \pm 14 \text{ E m}^{-2} \text{ d}^{-1}$ ; T =  $17.1 \pm 0.3 \text{ }^\circ\text{C}$ ) across a concentration gradient (initial) of added organic molecules, formic acid and dimethylsulfoxide (DMSO), that scavenge  $\bullet\text{OH}$ . Dashed line represents mean rate constant for  $\text{CH}_3\text{Hg}^+$  decomposition in Toolik Lake water exposed to sunlight without added organic molecules ( $k = 0.16 \pm 0.01 \text{ d}^{-1}$ ) .

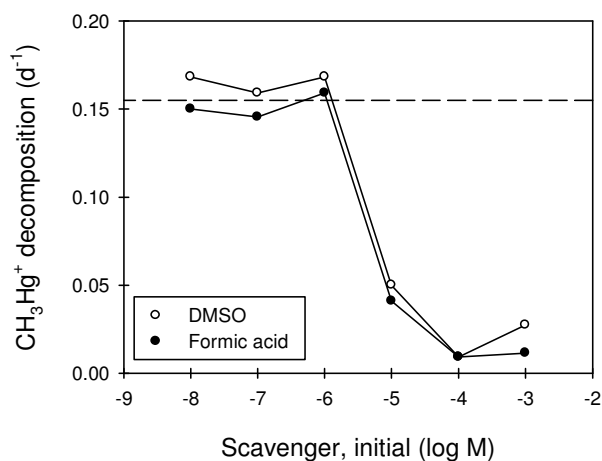

Supplement: Supplementary file 1 [file 4420426]
